# Supplementary material for: The Dynamics of Borrower Reputation Following Financial Misreporting
Source: Atypon-hosted journal article supplement (doi:10.1287/mnsc.2017.2739), 2017-05-25
Supplement: mnsc.2017.2739-sm-data.pdf [file mnsc.2017.2739-sm-data.pdf]

Data sources (see details in Section 2 of Chava et al.):

I. Publicly available:

GAO Restatements ([www.gao.gov](http://www.gao.gov))

Macroeconomic Variables ([fred.stlouisfed.org](http://fred.stlouisfed.org))

II. Purchased:

Bank Loans -- DealScan

Firms -- Compustat

Prices and returns -- CRSP

Reputation Rebuilding

    CEO/CFO -- Execucomp

    Audit Committee -- ISS Directors

    External Auditors -- AuditAnalytics

    Board Structure -- ISS Directors

    ESG -- MSCI KLD

    Spinoffs -- Thomson One M&A

    Firm Segments -- Compustat Historical Segments

    Internal Control Weakness -- AuditAnalytics

III. Others:

Classification of irregularities -- Obtained from Dr. Andrew Leone (University of Miami)

First revelation dates -- Obtained from Dr. Gerald Martin (American University)

Income statement effects -- Obtained from Dr. Gennaro Bernile (Singapore Management University)

Text-based constraints -- Obtained from Dr. Gerard Hoberg (University of Southern California)

Codes -- Available upon request
